# Supplementary material
Source: HighWire-hosted journal article supplement (https://www.cfp.ca/highwire/filestream/35650/field_highwire_adjunct_files/0/Figure_2.pdf)

**Figure 2.** N95 masks compared with surgical masks to prevent viral respiratory infections in health care workers: A) Outcome of confirmed influenza; B) outcome of confirmed viral respiratory infection; C) outcome of influenzalike illness; and D) outcome of any clinical respiratory infection.

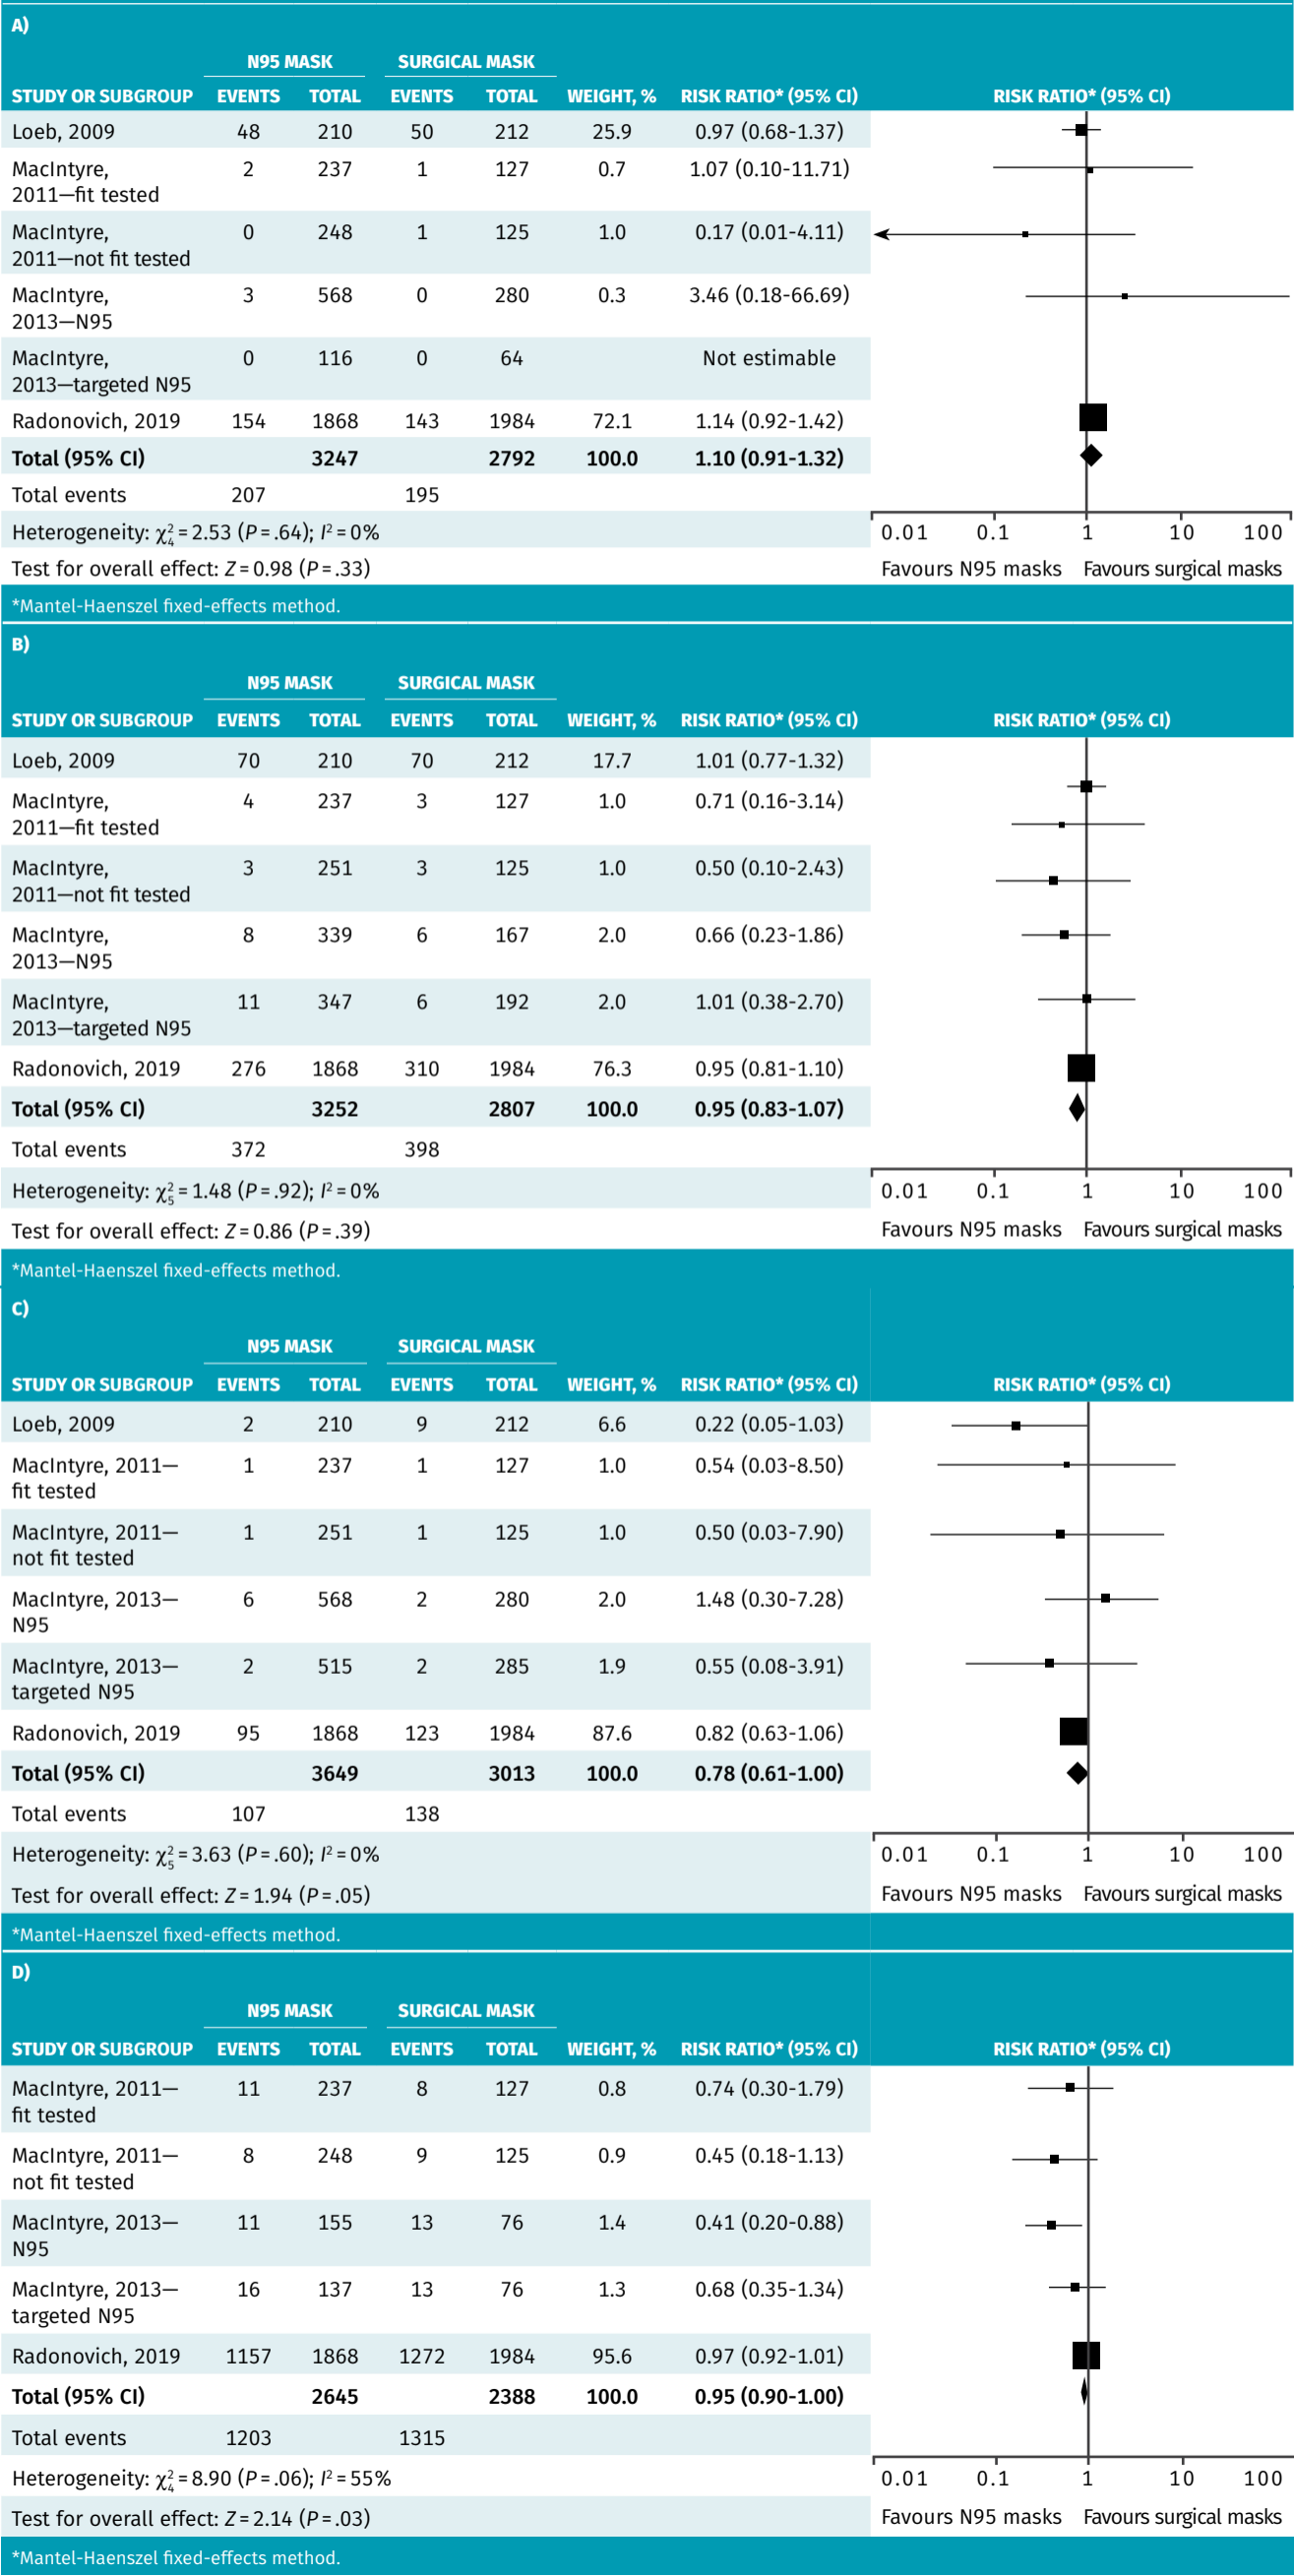

Supplement: Figure_2.pdf [file Figure_2.pdf]
